# Supplementary material for: Relaxation-Compensated Chemical Exchange Saturation Transfer MRI in the Brain at 7T: Application in Relapsing-Remitting Multiple Sclerosis
Source: Frontiers journal article supplement (doi:10.3389/fneur.2022.764690), 2022-02-25
Supplement: Data_Sheet_1.PDF [file Data_Sheet_1.PDF]

## Supplementary Material

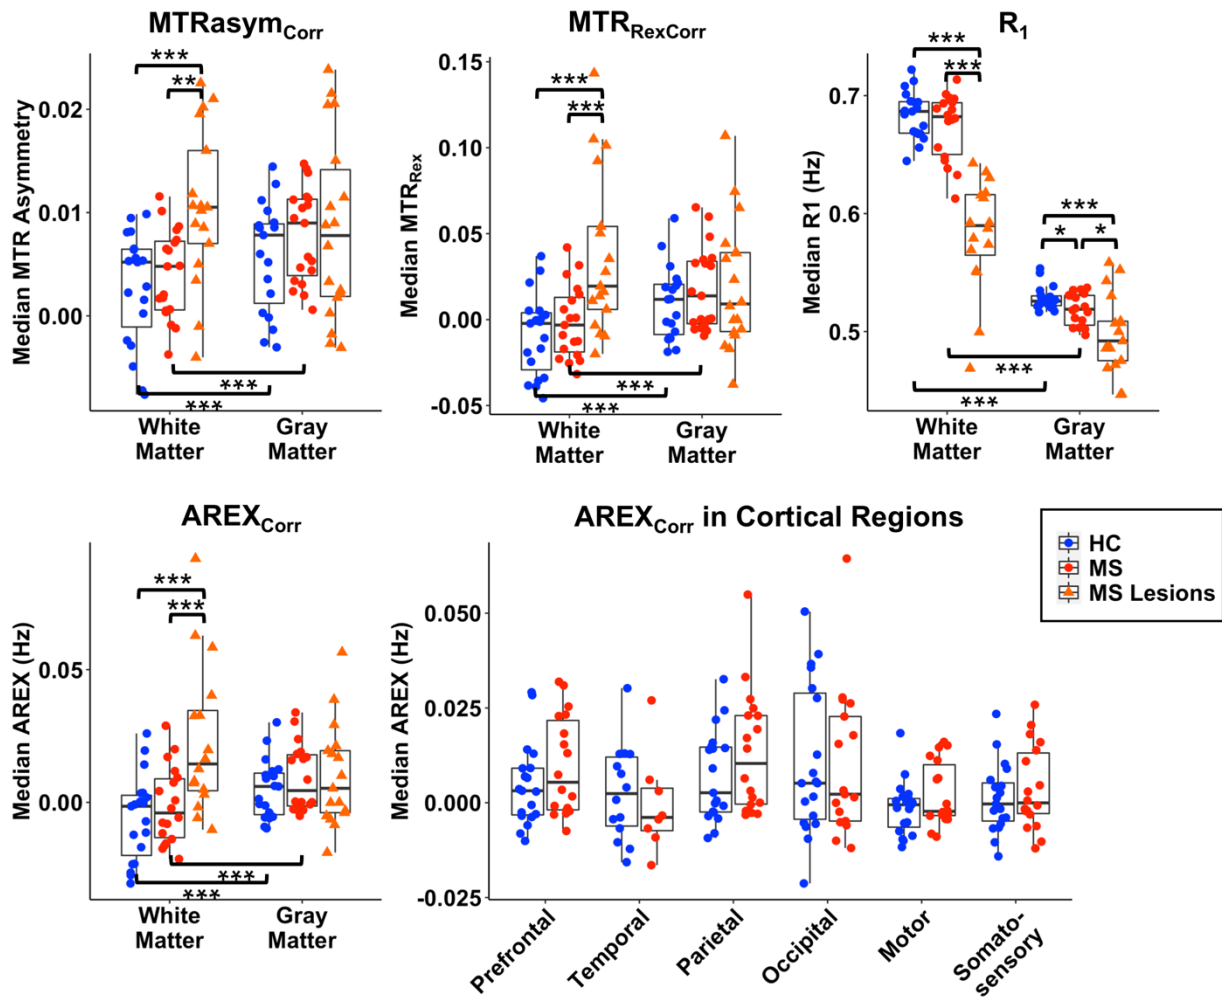

**Supplementary Figure 1.** Median values of  $MTR_{AsymCorr}$ ,  $MTR_{RexCorr}$ ,  $AREX_{Corr}$ , and  $R_1$  are shown for WM, GM, WM lesions, and cortical lesions for group comparisons.  $AREX_{Corr}$  values are also shown for each cortical GM region. WM lesion values differ significantly from normal-appearing WM in MS patients and from healthy control (HC) WM for all CEST-derived indices and for  $R_1$ . Significant differences in GM and cortical lesions are only present in  $R_1$ . No group differences are significant for  $AREX_{Corr}$  within cortical regions. All indices differ significantly between GM and WM within each group. \* $p<0.05$ , \*\* $p<0.01$ , \*\*\* $p<0.001$

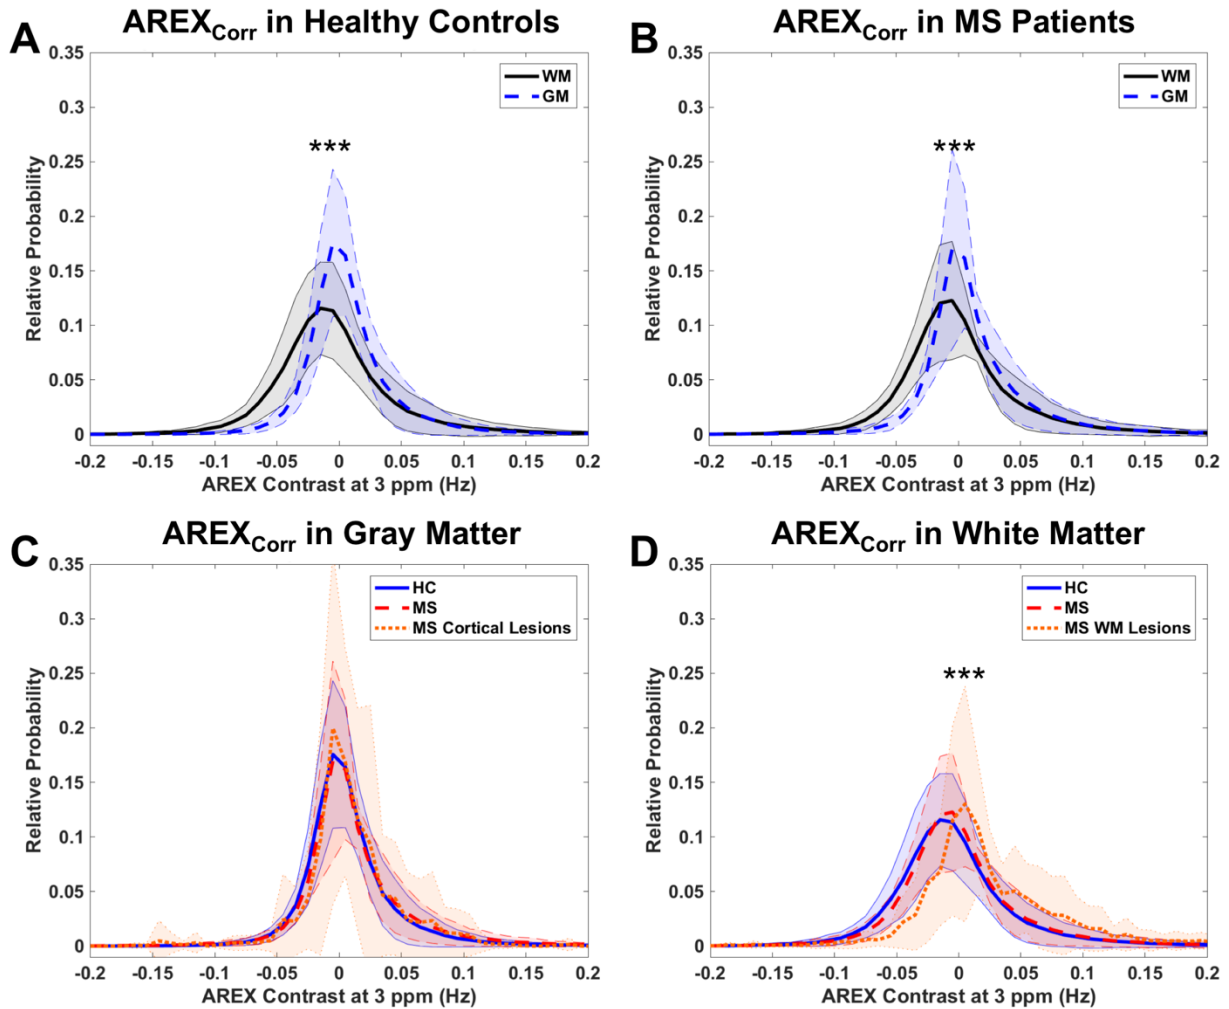

**Supplementary Figure 2.** Average histograms of  $AREX_{Corr}$  values are shown for WM, GM, WM lesions, and cortical lesions for within-group (**A**, **B**) and between-group (**C**, **D**) comparisons (shaded area represents standard deviation).  $AREX_{Corr}$  values are significantly greater in GM than in WM within the healthy control (HC) and MS patient groups.  $AREX_{Corr}$  is increased significantly in WM lesions compared to normal-appearing WM in MS patients and compared to WM in healthy volunteers. \*\*\* $p < 0.001$  for mean value comparison.

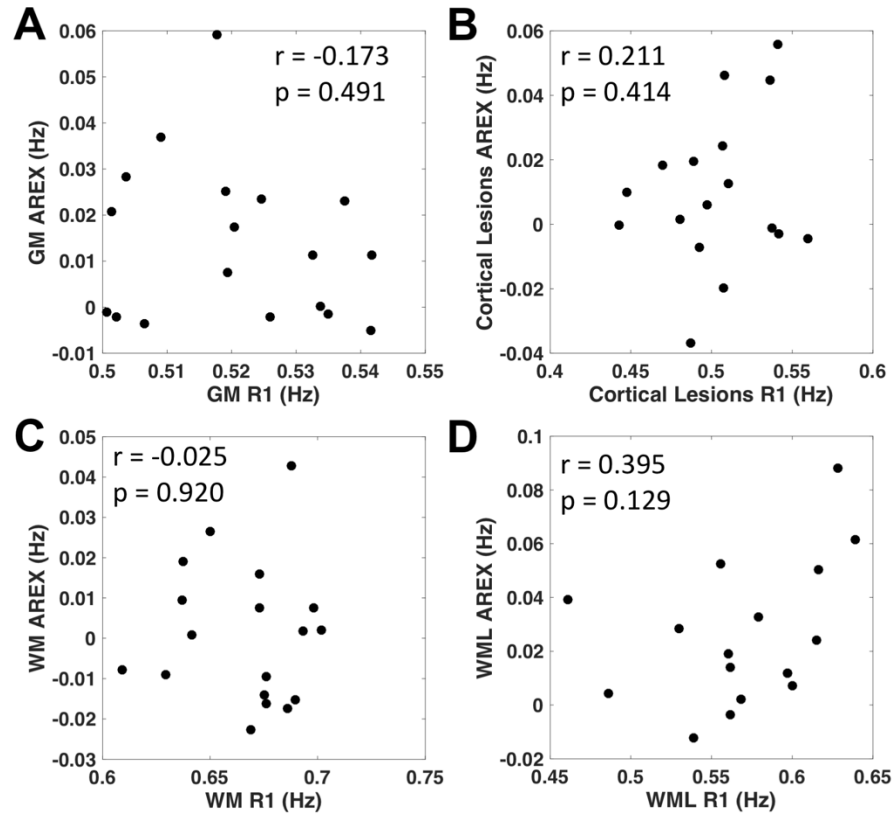

**Supplementary Figure 3.** Mean AREX<sub>Corr</sub> values do not correlate with corresponding mean R<sub>1</sub> values in each tissue region of interest in patients with MS. Plots are shown for normal-appearing GM (**A**), cortical lesions (**B**), normal-appearing WM (**C**), and WM lesions (**D**) with the corresponding Pearson correlation coefficient  $r$  and  $p$ -value.
